# Supplementary material for: Serum cytokine and inflammatory markers in individuals with heroin use disorder: potential biomarkers for diagnosis and disease severity
Source: bioRxiv or medRxiv preprint supplement (doi:10.1101/2024.04.29.24306559), 2024-05-01
Supplement: Supplementary file [file media-1.pdf]

**Supplement Figure S1:** Individual Beck Depression Inventory-II (BDI-II), Beck Anxiety Inventory (BAI) and Perceived Stress Scale (PSS-10) scores, in iHUD and HC in panels A-C, respectively; with line indicating median. Data were analyzed with Mann-Whitney U tests, as shown in Table 1. Note the frequent “0” (i.e., floor) scores especially in healthy controls, for BDI-II and BAI scales. iHUD “n” differs due to missing data.

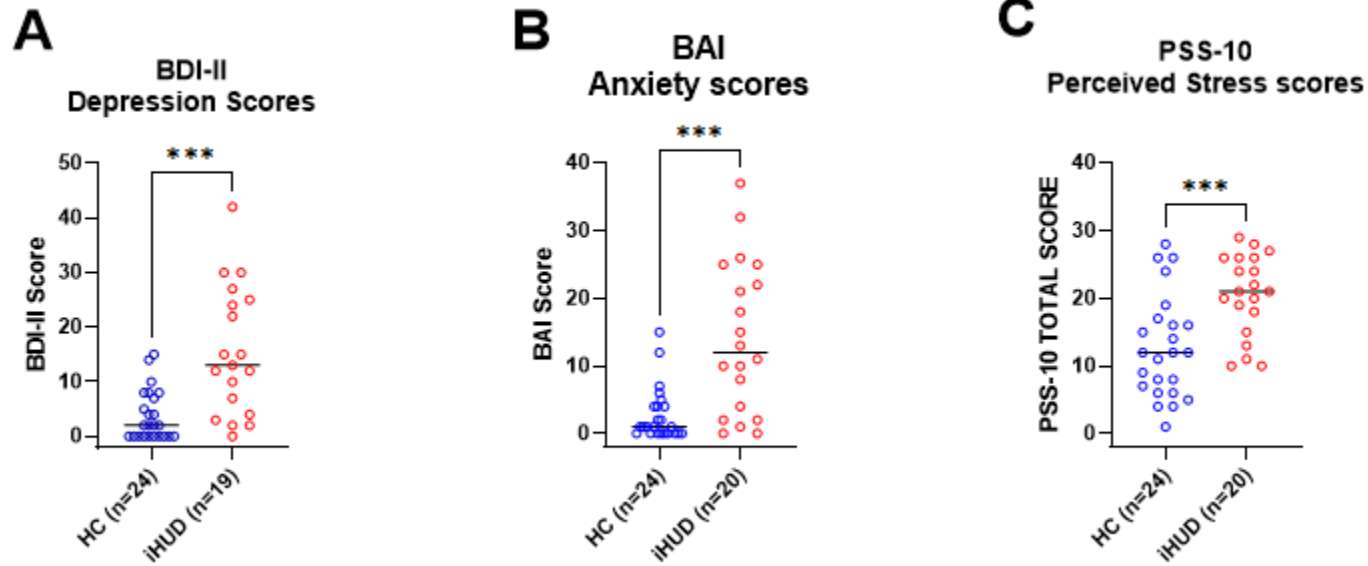

**Table S1. Data for the 29 targets with significant differences in iHUD versus HC after False Discovery Rate (FDR) correction. Targets in bold italics indicate the 19 cytokines from canonical families that are used in PCA analysis**

| Target                     | Family        | Used in PCA? | iHUD (n=21)                |       |                   | HC (n=24)                  |       |                   | iHUD vs HC comparison |                       |             |
|----------------------------|---------------|--------------|----------------------------|-------|-------------------|----------------------------|-------|-------------------|-----------------------|-----------------------|-------------|
|                            |               |              | Mean NPX units, log2 scale | 95%CI | Outliers Replaced | Mean NPX units, log2 scale | 95%CI | Outliers Replaced | W statistic           | Uncorrected p value   | FDR p value |
| <b><i>MCP1 / CCL2</i></b>  | Chemokines    | Yes          | 12.38                      | 0.24  | 0                 | 11.77                      | 0.28  | 0                 | 123                   | 0.0028                | 0.0116      |
| <b><i>MCP3 / CCL7</i></b>  | Chemokines    | Yes          | 2.91                       | 0.36  | 0                 | 2.21                       | 0.26  | 0                 | 122                   | 0.0026                | 0.0113      |
| <b><i>CCL19</i></b>        | Chemokines    | Yes          | 10.97                      | 0.31  | 1                 | 10.40                      | 0.16  | 1                 | 112                   | 0.0035                | 0.0130      |
| <b><i>CCL28</i></b>        | Chemokines    | Yes          | 2.06                       | 0.21  | 0                 | 2.54                       | 0.17  | 0                 | 408                   | 0.0002                | 0.0019      |
| <b><i>CXCL9</i></b>        | Chemokines    | Yes          | 7.10                       | 0.27  | 1                 | 6.58                       | 0.31  | 1                 | 118                   | 0.0057                | 0.0195      |
| <b><i>IL6</i></b>          | Interleukin   | Yes          | 3.44                       | 0.46  | 1                 | 2.70                       | 0.37  | 0                 | 126                   | 0.0066                | 0.0205      |
| <b><i>IL7</i></b>          | Interleukin   | Yes          | 2.15                       | 0.21  | 0                 | 2.52                       | 0.18  | 0                 | 362                   | 0.0117                | 0.0326      |
| <b><i>IL10RB</i></b>       | Interleukin   | Yes          | 6.75                       | 0.10  | 0                 | 6.40                       | 0.13  | 0                 | 98                    | 0.0003                | 0.0021      |
| <b><i>IL15RA</i></b>       | Interleukin   | Yes          | 1.41                       | 0.11  | 0                 | 1.21                       | 0.11  | 0                 | 132                   | 0.0057                | 0.0195      |
| <b><i>IL18</i></b>         | Interleukin   | Yes          | 10.02                      | 0.28  | 0                 | 9.56                       | 0.24  | 0                 | 137                   | 0.0083                | 0.0248      |
| <b><i>OSM</i></b>          | Interleukin   | Yes          | 7.47                       | 0.33  | 0                 | 6.64                       | 0.40  | 0                 | 122                   | 0.0026                | 0.0113      |
| <b><i>CSF1</i></b>         | Growth factor | Yes          | 10.22                      | 0.07  | 0                 | 9.98                       | 0.10  | 0                 | 93                    | 0.0002                | 0.0017      |
| <b><i>HGF</i></b>          | Growth factor | Yes          | 9.71                       | 0.20  | 0                 | 9.14                       | 0.22  | 0                 | 93                    | 0.0002                | 0.0017      |
| <b><i>SCF</i></b>          | Growth factor | Yes          | 8.95                       | 0.20  | 0                 | 9.50                       | 0.11  | 0                 | 431                   | 1.7X10 <sup>-5</sup>  | 0.0004      |
| <b><i>TGF.alpha</i></b>    | Growth factor | Yes          | 5.30                       | 0.29  | 0                 | 4.77                       | 0.24  | 0                 | 133                   | 0.0062                | 0.0200      |
| <b><i>CD40 / TNFR5</i></b> | TNF-related   | Yes          | 11.61                      | 0.14  | 0                 | 11.35                      | 0.13  | 0                 | 124                   | 0.0031                | 0.0120      |
| <b><i>TNFRSF9</i></b>      | TNF-related   | Yes          | 6.80                       | 0.22  | 0                 | 6.10                       | 0.17  | 1                 | 66                    | 1.23X10 <sup>-5</sup> | 0.0004      |
| <b><i>TNFSF14</i></b>      | TNF-related   | Yes          | 7.63                       | 0.29  | 0                 | 7.01                       | 0.30  | 0                 | 140                   | 0.0102                | 0.0295      |
| <b><i>TRAIL</i></b>        | TNF-related   | Yes          | 9.15                       | 0.09  | 0                 | 8.79                       | 0.13  | 0                 | 89                    | 0.0001                | 0.0015      |
| 4E-BP1                     | Other         | No           | 6.57                       | 0.55  | 0                 | 5.39                       | 0.42  | 1                 | 108                   | 0.0013                | 0.0065      |
| ADA                        | Other         | No           | 6.46                       | 0.20  | 0                 | 5.89                       | 0.15  | 1                 | 76                    | 4.49X10 <sup>-5</sup> | 0.0007      |
| AXIN1                      | Other         | No           | 3.88                       | 0.21  | 0                 | 3.35                       | 0.22  | 0                 | 114                   | 0.0013                | 0.0065      |
| CASP8                      | Other         | No           | 3.30                       | 0.23  | 0                 | 2.73                       | 0.24  | 0                 | 103                   | 0.0005                | 0.0029      |

|         |       |    |      |      |   |      |      |   |     |                       |                       |
|---------|-------|----|------|------|---|------|------|---|-----|-----------------------|-----------------------|
| CD5     | Other | No | 6.12 | 0.15 | 0 | 5.70 | 0.12 | 0 | 76  | $2.48 \times 10^{-5}$ | 0.0005                |
| CD6     | Other | No | 5.76 | 0.23 | 0 | 5.20 | 0.15 | 1 | 90  | 0.0002                | 0.0019                |
| CDCP1   | Other | No | 4.18 | 0.24 | 1 | 3.20 | 0.18 | 0 | 34  | $7.35 \times 10^{-8}$ | $5.73 \times 10^{-6}$ |
| EN.RAGE | Other | No | 6.84 | 0.34 | 0 | 6.18 | 0.37 | 0 | 145 | 0.0143                | 0.0386                |
| SLAMF1  | Other | No | 2.51 | 0.16 | 0 | 2.06 | 0.18 | 0 | 103 | 0.0005                | 0.0029                |
| STAMBP  | Other | No | 4.54 | 0.21 | 0 | 4.04 | 0.17 | 1 | 99  | 0.0006                | 0.0032                |

**Table S2. Data for 49 targets without significant differences between iHUD and HC after FDR correction**

| Target         | iHUD (n=21)                |       | HC (n=24)                  |       | iHUD vs HC comparison |                    |             |
|----------------|----------------------------|-------|----------------------------|-------|-----------------------|--------------------|-------------|
|                | Mean NPX units, log2 scale | 95%CI | Mean NPX units, log2 scale | 95%CI | W statistic           | Unadjusted p value | FDR p value |
| uPA            | 10.71                      | 0.11  | 10.51                      | 0.14  | 151                   | 0.02               | 0.06        |
| IL.18R1        | 7.27                       | 0.16  | 6.98                       | 0.15  | 153                   | 0.02               | 0.06        |
| TNFB           | 5.01                       | 0.22  | 4.75                       | 0.18  | 158                   | 0.03               | 0.08        |
| CXCL1          | 9.11                       | 0.29  | 9.77                       | 0.41  | 344                   | 0.04               | 0.08        |
| IL10           | 3.34                       | 0.23  | 3.00                       | 0.23  | 160                   | 0.04               | 0.08        |
| TNF            | 4.00                       | 0.15  | 3.84                       | 0.22  | 153                   | 0.04               | 0.08        |
| SIRT2          | 2.79                       | 0.29  | 2.33                       | 0.40  | 161                   | 0.04               | 0.08        |
| IL.17C         | 2.20                       | 0.20  | 2.67                       | 0.35  | 325                   | 0.05               | 0.10        |
| TRANCE         | 5.59                       | 0.30  | 5.17                       | 0.31  | 167                   | 0.05               | 0.11        |
| Flt3L          | 9.85                       | 0.20  | 9.58                       | 0.18  | 169                   | 0.06               | 0.12        |
| CXCL6          | 9.18                       | 0.32  | 9.79                       | 0.39  | 335                   | 0.06               | 0.12        |
| IFN.gamma      | 7.46                       | 0.36  | 7.01                       | 0.34  | 170                   | 0.06               | 0.12        |
| MMP.1          | 15.44                      | 0.26  | 15.80                      | 0.33  | 333                   | 0.07               | 0.12        |
| CD8A           | 10.30                      | 0.30  | 9.90                       | 0.31  | 177                   | 0.09               | 0.16        |
| IL.12B         | 6.87                       | 0.32  | 6.53                       | 0.31  | 177                   | 0.09               | 0.16        |
| CCL23          | 11.74                      | 0.20  | 11.48                      | 0.20  | 177                   | 0.09               | 0.16        |
| CD244          | 5.55                       | 0.15  | 5.39                       | 0.15  | 180                   | 0.10               | 0.18        |
| MMP.10         | 8.91                       | 0.28  | 8.65                       | 0.20  | 182                   | 0.11               | 0.19        |
| VEGFA          | 12.90                      | 0.23  | 12.65                      | 0.21  | 184                   | 0.13               | 0.20        |
| MCP.4          | 15.72                      | 0.23  | 15.91                      | 0.21  | 314                   | 0.16               | 0.26        |
| CXCL10         | 8.37                       | 0.39  | 8.04                       | 0.34  | 191                   | 0.17               | 0.27        |
| GNDF           | 1.72                       | 0.14  | 1.87                       | 0.15  | 300                   | 0.17               | 0.27        |
| CCL25          | 6.32                       | 0.25  | 6.64                       | 0.34  | 311                   | 0.19               | 0.28        |
| DNER           | 9.39                       | 0.10  | 9.48                       | 0.12  | 308                   | 0.21               | 0.31        |
| FGF.23         | 0.85                       | 0.25  | 0.73                       | 0.24  | 190                   | 0.23               | 0.34        |
| LAP.TGF.beta.1 | 7.13                       | 0.10  | 7.22                       | 0.13  | 299                   | 0.29               | 0.41        |

|                |       |      |       |      |     |      |      |
|----------------|-------|------|-------|------|-----|------|------|
| <b>TWEAK</b>   | 10.00 | 0.16 | 9.90  | 0.14 | 205 | 0.29 | 0.41 |
| <b>CXCL5</b>   | 12.56 | 0.39 | 12.91 | 0.34 | 298 | 0.30 | 0.42 |
| <b>CCL11</b>   | 8.20  | 0.19 | 8.16  | 0.30 | 208 | 0.33 | 0.44 |
| <b>LIF.R</b>   | 3.57  | 0.11 | 3.66  | 0.08 | 292 | 0.37 | 0.49 |
| <b>IL.20RA</b> | 0.41  | 0.16 | 0.53  | 0.22 | 277 | 0.39 | 0.51 |
| <b>PD.L1</b>   | 5.75  | 0.16 | 5.71  | 0.18 | 204 | 0.41 | 0.52 |
| <b>CX3CL1</b>  | 4.60  | 0.18 | 4.69  | 0.19 | 285 | 0.46 | 0.58 |
| <b>FGF.19</b>  | 8.93  | 0.24 | 8.86  | 0.33 | 226 | 0.57 | 0.70 |
| <b>IL.10RA</b> | 1.13  | 0.31 | 1.07  | 0.29 | 230 | 0.63 | 0.77 |
| <b>OPG</b>     | 9.92  | 0.16 | 9.91  | 0.13 | 232 | 0.66 | 0.78 |
| <b>ST1A1</b>   | 4.67  | 0.53 | 4.56  | 0.47 | 232 | 0.66 | 0.78 |
| <b>CXCL11</b>  | 8.28  | 0.50 | 8.55  | 0.56 | 271 | 0.68 | 0.79 |
| <b>ARTN</b>    | 0.19  | 0.13 | 0.16  | 0.09 | 224 | 0.72 | 0.82 |
| <b>MCP.2</b>   | 9.80  | 0.27 | 9.91  | 0.24 | 268 | 0.73 | 0.82 |
| <b>NT.3</b>    | 2.58  | 0.20 | 2.54  | 0.13 | 238 | 0.76 | 0.85 |
| <b>CCL4</b>    | 7.62  | 0.26 | 7.57  | 0.29 | 247 | 0.92 | 0.97 |
| <b>FGF.5</b>   | 1.66  | 0.08 | 1.69  | 0.14 | 257 | 0.92 | 0.97 |
| <b>FGF.21</b>  | 4.95  | 0.69 | 4.89  | 0.59 | 257 | 0.92 | 0.97 |
| <b>CCL20</b>   | 7.58  | 0.26 | 7.69  | 0.41 | 247 | 0.92 | 0.97 |
| <b>IL8</b>     | 6.98  | 0.43 | 6.93  | 0.39 | 226 | 0.93 | 0.97 |
| <b>IL.17A</b>  | 0.68  | 0.17 | 0.74  | 0.22 | 239 | 0.96 | 0.98 |
| <b>CCL3</b>    | 6.98  | 0.31 | 7.01  | 0.37 | 239 | 0.96 | 0.98 |
| <b>CST5</b>    | 7.70  | 0.24 | 7.76  | 0.28 | 252 | 1.00 | 1.00 |

**Table S3. PC1 Loadings for 19 cytokine components of PCA**

| <b>Cytokine</b>     | <b>Family</b> | <b>PC1 Loading<br/>(Eigenvector*<math>\sqrt{\text{Eigenvalue}}</math>)</b> |
|---------------------|---------------|----------------------------------------------------------------------------|
| <b>MCP.1 / CCL2</b> | Chemokines    | 0.55                                                                       |
| <b>MCP.3 / CCL7</b> | Chemokines    | 0.71                                                                       |
| <b>CCL19</b>        | Chemokines    | 0.61                                                                       |
| <b>CCL28</b>        | Chemokines    | -0.19                                                                      |
| <b>CXCL9</b>        | Chemokines    | 0.67                                                                       |
| <b>IL7</b>          | Interleukin   | -0.22                                                                      |
| <b>IL6</b>          | Interleukin   | 0.55                                                                       |
| <b>IL.10RB</b>      | Interleukin   | 0.59                                                                       |
| <b>IL.15RA</b>      | Interleukin   | 0.69                                                                       |
| <b>IL18</b>         | Interleukin   | 0.63                                                                       |
| <b>OSM</b>          | Interleukin   | 0.70                                                                       |
| <b>CSF.1</b>        | Growth factor | 0.86                                                                       |
| <b>HGF</b>          | Growth factor | 0.79                                                                       |
| <b>SCF</b>          | Growth factor | -0.55                                                                      |
| <b>TGF.alpha</b>    | Growth factor | 0.60                                                                       |
| <b>CD40 /TNFR5</b>  | TNF-related   | 0.67                                                                       |

|                |             |      |
|----------------|-------------|------|
| <b>TNFRSF9</b> | TNF-related | 0.77 |
| <b>TNFSF14</b> | TNF-related | 0.68 |
| <b>TRAIL</b>   | TNF-related | 0.72 |

**Table S4. Correlation of cytokine PC1 scores (19 cytokines, see tables S1 and S3) with demographic and clinical variables**

| Variable                                     | Spearman correlations of cytokine PC1 scores with clinical and phenotypic variables |                        |                                                                    |                      |                                                      |                      |
|----------------------------------------------|-------------------------------------------------------------------------------------|------------------------|--------------------------------------------------------------------|----------------------|------------------------------------------------------|----------------------|
|                                              | <i>iHUD only</i><br>(n=21 unless otherwise stated)                                  |                        | <i>HC only</i><br>(n=24 unless otherwise stated)                   |                      | <i>iHUD and HC</i><br>(n=45 unless otherwise stated) |                      |
|                                              | R<br>(uncorrected p)                                                                | FDR<br>(uncorrected p) | R<br>(uncorrected p)                                               | FDR<br>(corrected p) | R<br>(uncorrected p)                                 | FDR<br>(corrected p) |
| <b>Age</b>                                   | -0.21 (0.36)                                                                        | NS                     | 0.14 (0.52)                                                        | NS                   | 0.084 (0.59)                                         | NS                   |
| <b>BMI</b>                                   | 0.0078 (0.97)                                                                       | NS                     | 0.34 (0.11)                                                        | NS                   | <b>0.43 (0.0031)</b>                                 | <b>p=0.012</b>       |
| <b>Sleep hours in the prior night</b>        | 0.046 (0.85)                                                                        | NS                     | 0.33 (0.11)                                                        | NS                   | 0.19 (0.22)                                          | NS                   |
| <b>Perceived Stress PSS-10 scores</b>        | -0.35 (0.14)<br>n=20                                                                | NS                     | -0.32 (0.13)                                                       | NS                   | 0.16 (0.3)<br>n=44                                   | NS                   |
| <b>Depression BDI-II scores</b>              | <b>-0.49 (0.032)</b><br>n=19                                                        | NS                     | Not calculated due to “floor” effect in HC; See Supplement Fig. S1 |                      |                                                      |                      |
| <b>Anxiety BAI scores</b>                    | -0.12 (0.60)<br>n=20                                                                | NS                     |                                                                    |                      |                                                      |                      |
| <b>Age of onset of first use of heroin</b>   | -0.42 (0.069)                                                                       | NS                     | N/A                                                                | N/A                  | N/A                                                  | N/A                  |
| <b>Age of onset of regular use of heroin</b> | <b>-0.48 (0.031)</b>                                                                | NS                     | N/A                                                                | N/A                  | N/A                                                  | N/A                  |
| <b>Years of regular heroin use</b>           | -0.23 (0.35)                                                                        | NS                     | N/A                                                                | N/A                  | N/A                                                  | N/A                  |
| <b>Heroin</b>                                | <b>0.50 (0.02)</b>                                                                  | NS                     | N/A                                                                | N/A                  | N/A                                                  | N/A                  |



|                                   |                     |    |     |     |     |     |
|-----------------------------------|---------------------|----|-----|-----|-----|-----|
| <b>abstinence duration</b>        |                     |    |     |     |     |     |
| <b>Methadone daily dose in mg</b> | 0.25 (0.34)<br>n=16 | NS | N/A | N/A | N/A | N/A |

**FDR: False discovery rate; 5% cutoff level**

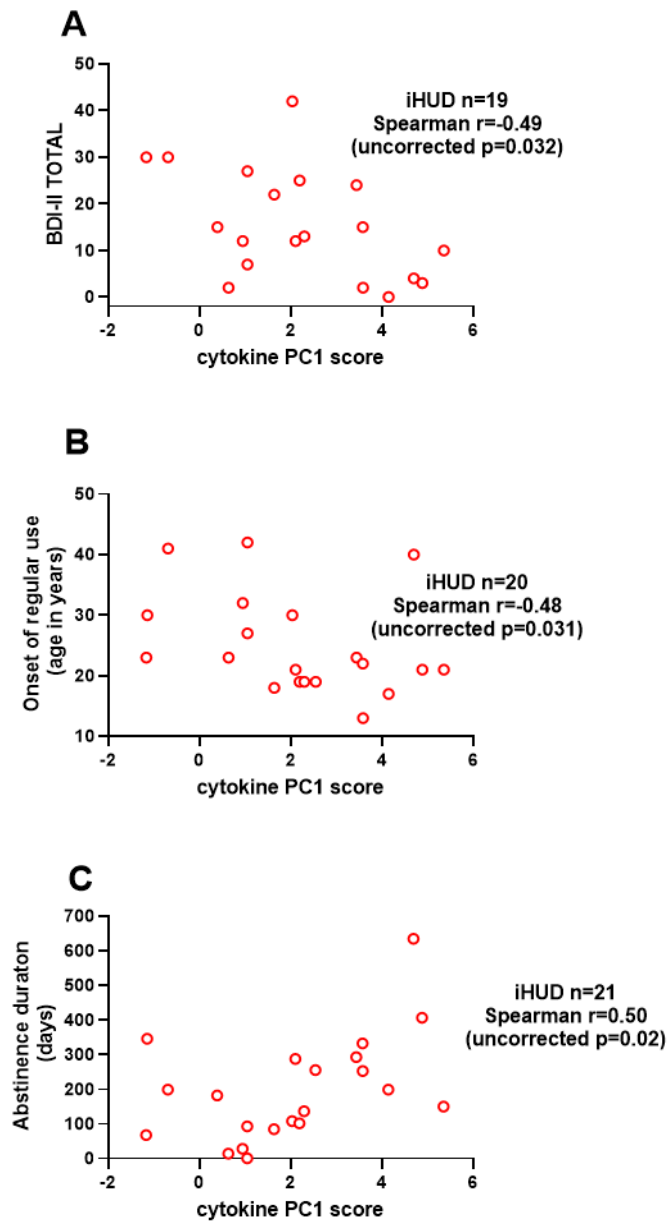

**Figure S2:** Correlation of individual cytokine PC1 scores with BDI-II scores, age of onset of regular heroin use and abstinence duration in iHUD (panels A,B,C respectively); “n” differs across panels due to missing data.
